# Supplementary material for: Resistance Genes, Plasmids, Multilocus Sequence Typing (MLST), and Phenotypic Resistance of Non-Typhoidal Salmonella (NTS) Isolated from Slaughtered Chickens in Burkina Faso
Source: MDPI journal article supplement (doi:10.3390/antibiotics11060782), 2022-06-08
Supplement: s1 [file s1]

**Supplemental Table S1. Characteristics of Salmonella isolated from slaughtered chickens.**

| Sample | Serotype              | Antimicrobial Resistances Genes <sup>a</sup>                                                                                                               | Partial Antimicrobial Resistance Genes | Phenotypic Resistance Profile <sup>b,c</sup> | Plasmid Repliconsc                                   | Partial Plasmid Replicons | Chromosomal Point Mutationc | Multi-Locus Sequence Type (MLST) |
|--------|-----------------------|------------------------------------------------------------------------------------------------------------------------------------------------------------|----------------------------------------|----------------------------------------------|------------------------------------------------------|---------------------------|-----------------------------|----------------------------------|
| S38    | Albany or Duesseldorf | <i>aac</i> (6')-Iaa;<br><i>aph</i> (3')-Ia;<br><i>tet</i> (A)                                                                                              |                                        | TET                                          | IncI1-I (Alpha)                                      |                           | parC p.T57S                 | 292                              |
| S39    | Chester               | <i>aac</i> (6')-Iaa                                                                                                                                        |                                        | ND                                           | ND                                                   |                           | parC p.T57S                 | 411                              |
| S47    | Hato                  | <i>aac</i> (6')-Iaa                                                                                                                                        |                                        | ND                                           | IncFIB (H89-<br>PhagePlasmid)                        |                           | parC p.T57S                 | Unknown                          |
| S52    | Chester               | <i>aac</i> (6')-Iaa                                                                                                                                        |                                        | ND                                           | ND                                                   |                           | parC p.T57S                 | 411                              |
| S53    | Hato                  | <i>aac</i> (6')-Iaa                                                                                                                                        |                                        | ND                                           | ND                                                   |                           | parC p.T57S                 | 3899                             |
| S58    | Telelkebir            | <i>aac</i> (6')-Iaa;<br><i>fosA7</i>                                                                                                                       |                                        | ND                                           | IncFIB(S)                                            |                           | parC p.T57S                 | 2386                             |
| S59    | Typhimurium           | <i>aac</i> (6')-Iaa;<br><i>bla</i> TEM-1B;<br><i>mph</i> (A)                                                                                               |                                        | AMP; AMPSUL<br>(A/S2); PIP;<br>TICCLA(TIM2)  | Col440I,<br>IncFIB(S),<br>IncFII(S),<br>IncFII(pCoo) |                           | ND                          | 313                              |
| S60    | Telelkebir            | <i>aac</i> (6')-Iaa;<br><i>fosA7</i>                                                                                                                       |                                        | ND                                           | ND                                                   |                           | parC p.T57S                 | 5494                             |
| S63    | Hato                  | <i>aac</i> (6')-Iaa                                                                                                                                        |                                        | ND                                           | ND                                                   |                           | parC p.T57S                 | 3899                             |
| S64    | Agona                 | <i>aac</i> (6')-Iaa;<br><i>fosA7</i>                                                                                                                       |                                        | ND                                           | ND                                                   |                           | parC p.T57S                 | 7876                             |
| S65    | Derby                 | <i>aac</i> (6')-Iaa                                                                                                                                        |                                        | ND                                           | ND                                                   |                           | parC p.T57S                 | 7119                             |
| S66    | I 1,3,19:f,g:1,5      | <i>aac</i> (6')-Iaa                                                                                                                                        |                                        | ND                                           | ND                                                   |                           | parC p.T57S                 | Unknown                          |
| S67    | Chester               | <i>aac</i> (6')-Iaa                                                                                                                                        |                                        | ND                                           | ND                                                   |                           | parC p.T57S                 | 411                              |
| S69    | Kentucky              | <i>aac</i> (6')-Iaa;<br><i>aac</i> (3)-Id;<br><i>aadA7</i> ; <i>aph</i> (3")-<br>Ib; <i>aph</i> (6)-Id;<br><i>dfrA15</i> ; <i>sul1</i> ;<br><i>tet</i> (A) | <i>qacE</i>                            | GEN; TET;<br>TRISUL(SXT)                     | ND                                                   |                           | parC p.T57S                 | 314                              |
| S71    | Virchow               | <i>aac</i> (6')-Iaa                                                                                                                                        |                                        | ND                                           | IncI1-I (Alpha)                                      |                           | ND                          | 181                              |

|      |                |                                                                                            |      |                          |                                            |                           |         |
|------|----------------|--------------------------------------------------------------------------------------------|------|--------------------------|--------------------------------------------|---------------------------|---------|
| S72  | Amoutive       | aac(6')-Iaa                                                                                |      | ND                       | ND                                         | parC p.T57S               | Unknown |
| S74  | Kentucky       | aac(6')-Iaa;<br>aac(3)-Id;<br>aadA7; aph(3")-<br>Ib; aph(6)-Id;<br>dfrA15; sul1;<br>tet(A) | qacE | GEN; TET;<br>TRISUL(SXT) | ND                                         | parC p.T57S               | 314     |
| S75  | Typhimurium    | aac(6')-Iaa                                                                                |      | GEN; TET;<br>TRISUL(SXT) | ColRNAI,<br>IncFIB(S),<br>IncFII(S), IncX1 | ND                        | 19      |
| S80  | Derby          | aac(6')-Iaa                                                                                |      | ND                       | Col8282,<br>IncFIB (H89-<br>PhagePlasmid)  | IncB/O/K/Z<br>parC p.T57S | 5421    |
| S82  | Chester        | aac(6')-Iaa                                                                                |      | ND                       | ND                                         | parC p.T57S               | 411     |
| S83  | Typhimurium    | aac(6')-Iaa                                                                                |      | ND                       | ColRNAI,<br>IncFIB(S),<br>IncFII(S), IncX1 | ND                        | 19      |
| S86  | Brancaster     | aac(6')-Iaa                                                                                |      | ND                       | ND                                         | parC p.T57S               | Unknown |
| S90  | Gaminara       | aac(6')-Iaa                                                                                |      | ND                       | ND                                         | parC p.T57S               | 2152    |
| S91  | Derby          | aac(6')-Iaa                                                                                |      | ND                       | ND                                         | parC p.T57S               | 7882    |
| S92  | Derby          | aac(6')-Iaa                                                                                |      | ND                       | ND                                         | parC p.T57S               | 7882    |
| S93  | Schwarzengrund | aac(6')-Iaa                                                                                |      | ND                       | ND                                         | parC p.T57S               | 96      |
| S94  | Derby          | aac(6')-Iaa                                                                                |      | ND                       | ND                                         | parC p.T57S               | 7880    |
| S96  | Farmingdale    | aac(6')-Iaa                                                                                |      | ND                       | ND                                         | parC p.T57S               | Unknown |
| S97  | Derby          | aac(6')-Iaa                                                                                |      | ND                       | ND                                         | parC p.T57S               | 7880    |
| S99  | Anatum         | aac(6')-Iaa                                                                                |      | ND                       | ND                                         | parC p.T57S               | 5197    |
| S102 | Bredeney       | aac(6')-Iaa                                                                                |      | ND                       | ND                                         | parC p.T57S               | 306     |
| S104 | Alexanderplatz | aac(6')-Iaa                                                                                |      | ND                       | IncFII(S)                                  | IncB/O/K/Z<br>parC p.T57S | Unknown |
| S105 | Derby          | aac(6')-Iaa                                                                                |      | ND                       | ND                                         | parC p.T57S               | 7882    |
| S106 | Rehovot        | aac(6')-Iaa                                                                                |      | ND                       | ND                                         | parC p.T57S               | Unknown |
| S107 | Bredeney       | aac(6')-Iaa                                                                                |      | ND                       | ND                                         | parC p.T57S               | 306     |
| S109 | Derby          | aac(6')-Iaa                                                                                |      | ND                       | ND                                         | parC p.T57S               | 7882    |
| S110 | Eastbourne     | aac(6')-Iaa                                                                                |      | ND                       | ND                                         | parC p.T57S               | 414     |

|      |                |             |    |                               |             |             |         |
|------|----------------|-------------|----|-------------------------------|-------------|-------------|---------|
| S112 | Hato           | aac(6')-Iaa | ND | ND                            | parC p.T57S | 3997        |         |
| S114 | Hato           | aac(6')-Iaa | ND | ND                            | parC p.T57S | Unknown     |         |
| S115 | Derby          | aac(6')-Iaa | ND | ND                            | parC p.T57S | 7880        |         |
| S118 | Poona          | aac(6')-Iaa | ND | ND                            | parC p.T57S | 308         |         |
| S120 | Derby          | aac(6')-Iaa | ND | ND                            | parC p.T57S | 7882        |         |
| S121 | Poona          | aac(6')-Iaa | ND | ND                            | parC p.T57S | 308         |         |
| S123 | Bredeney       | aac(6')-Iaa | ND | ND                            | parC p.T57S | 306         |         |
| S124 | Derby          | aac(6')-Iaa | ND | ND                            | parC p.T57S | 7880        |         |
| S125 | Hato           | aac(6')-Iaa | ND | ND                            | parC p.T57S | Unknown     |         |
| S126 | Rechovot       | aac(6')-Iaa | ND | ND                            | parC p.T57S | Unknown     |         |
| S132 | Derby          | aac(6')-Iaa | ND | ND                            | parC p.T57S | 7882        |         |
| S133 | Derby          | aac(6')-Iaa | ND | ND                            | parC p.T57S | 7882        |         |
| S140 | Alexanderplatz | aac(6')-Iaa | ND | IncFII(S)                     | IncB/O/K/Z  | parC p.T57S | Unknown |
| S143 | Alexanderplatz | aac(6')-Iaa | ND | IncFII(S)                     | IncB/O/K/Z  | parC p.T57S | Unknown |
| S145 | Tennessee      | aac(6')-Iaa | ND | ND                            | parC p.T57S | 8398        |         |
| S147 | Drac           | aac(6')-Iaa | ND | ND                            | parC p.T57S | 2221        |         |
| S148 | Muenster       | aac(6')-Iaa | ND | ND                            | parC p.T57S | 321         |         |
| S149 | Muenster       | aac(6')-Iaa | ND | ND                            | parC p.T57S | 321         |         |
| S150 | Muenster       | aac(6')-Iaa | ND | ND                            | parC p.T57S | 321         |         |
| S151 | Muenster       | aac(6')-Iaa | ND | ND                            | parC p.T57S | 321         |         |
| S152 | Muenster       | aac(6')-Iaa | ND | ND                            | parC p.T57S | 321         |         |
| S153 | Muenster       | aac(6')-Iaa | ND | ND                            | parC p.T57S | 321         |         |
| S154 | Muenster       | aac(6')-Iaa | ND | ND                            | parC p.T57S | 321         |         |
| S155 | Poona          | aac(6')-Iaa | ND | ND                            | parC p.T57S | 608         |         |
| S156 | Poona          | aac(6')-Iaa | ND | ND                            | parC p.T57S | 608         |         |
| S162 | I 1,3,19:b:-   | aac(6')-Iaa | ND | ND                            | parC p.T57S | Unknown     |         |
| S163 | Derby          | aac(6')-Iaa | ND | IncFIB (H89-<br>PhagePlasmid) | parC p.T57S | 3135        |         |
| S164 | I 1,3,19:b:-   | aac(6')-Iaa | ND | ND                            | parC p.T57S | Unknown     |         |

|             |              |                                                                             |                                                     |                          |                                            |       |             |         |
|-------------|--------------|-----------------------------------------------------------------------------|-----------------------------------------------------|--------------------------|--------------------------------------------|-------|-------------|---------|
| <b>S165</b> | Derby        | aac(6')-Iaa                                                                 |                                                     | ND                       | IncFIB (H89-<br>PhagePlasmid)              |       | parC p.T57S | 3135    |
| <b>S167</b> | I 1,3,19:b:- | aac(6')-Iaa                                                                 |                                                     | ND                       | ND                                         |       | parC p.T57S | Unknown |
| <b>S168</b> | Typhimurium  | aac(6')-Iaa                                                                 |                                                     | ND                       | ColRNAI,<br>IncFIB(S),<br>IncFII(S), IncX1 |       | ND          | 19      |
| <b>S169</b> | Hato         | aac(6')-Iaa                                                                 |                                                     | ND                       | IncFIB (H89-<br>PhagePlasmid)              |       | parC p.T57S | 3292    |
| <b>S170</b> | Derby        | aac(6')-Iaa                                                                 |                                                     | ND                       | IncFIB (H89-<br>PhagePlasmid)              |       | parC p.T57S | 3135    |
| <b>S171</b> | Derby        | aac(6')-Iaa;<br>fosA7                                                       |                                                     | ND                       | Col(pHAD28),<br>IncI1-I (Alpha)            |       | parC p.T57S | 7881    |
| <b>S172</b> | Kentucky     | aac(6')-Iaa;<br>dfrA15; sul1                                                | qacE                                                | TRISUL(SXT)              | ND                                         |       | parC p.T57S | 314     |
| <b>S175</b> | Hato         | aac(6')-Iaa;<br>aadA1; sul2;<br>tet(A)                                      | dfrA14;<br>aph(3'')-Ib;<br>aph(6)-Id;<br>aph(3')-Ia | TET;<br>TRISUL(SXT)      | IncI1-I (Alpha)                            | IncQ1 | parC p.T57S | 3899    |
| <b>S183</b> | Derby        | aac(6')-Iaa;<br>aph(3'')-Ib;<br>aph(6)-Id; sul2;<br>tet(A)                  |                                                     | MIN; TET                 | IncFIB (H89-<br>PhagePlasmid),<br>IncQ1    |       | parC p.T57S | 3135    |
| <b>S184</b> | Hato         | aac(6')-Iaa;<br>aph(3')-Ia;<br>[aph(3'')-Ib];<br>aph(6)-Id;<br>dfrA14; sul2 |                                                     | TRISUL(SXT)              | IncI1-I (Alpha)                            | IncQ1 | parC p.T57S | 3899    |
| <b>S185</b> | Hato         | aac(6')-Iaa;<br>aadA1; aph(3')-<br>Ia; dfrA14; sul2;<br>tet(A)              | aph(3'')-Ib;<br>aph(6)-Id                           | MIN; TET;<br>TRISUL(SXT) | IncI1-I (Alpha)                            | IncQ1 | parC p.T57S | 3899    |
| <b>S186</b> | Hato         | aac(6')-Iaa;<br>aadA1; sul2;<br>tet(A)                                      | dfrA14;<br>aph(3'')-Ib;<br>aph(6)-Id;<br>aph(3')-Ia | TET;<br>TRISUL(SXT)      | IncI1-I (Alpha)                            | IncQ1 | parC p.T57S | 3899    |

|             |       |                                                                              |                                      |                          |                                                                     |       |             |      |
|-------------|-------|------------------------------------------------------------------------------|--------------------------------------|--------------------------|---------------------------------------------------------------------|-------|-------------|------|
| <b>S187</b> | Hato  | aac(6')-Iaa;<br>aadA1; aph(3')-<br>Ia; aph(6)-Id;<br>sul2; tet(A)            | dfrA14;<br>aph(3'')-Ib               | TET;<br>TRISUL(SXT)      | IncI1-I (Alpha)                                                     | IncQ1 | parC p.T57S | 3899 |
| <b>S188</b> | Hato  | aac(6')-Iaa;<br>aadA1; aph(3')-<br>Ia; [aph(3'')-Ib];<br>sul2; tet(A)        | dfrA14;<br>aph(6)-Id                 | MIN; TET;<br>TRISUL(SXT) | IncI1-I (Alpha)                                                     | IncQ1 | parC p.T57S | 3899 |
| <b>S191</b> | Hato  | aac(6')-Iaa;<br>aadA1; aph(3')-<br>Ia; aph(6)-Id;<br>dfrA14; sul2;<br>tet(A) | aph(3'')-Ib                          | MIN; TET;<br>TRISUL(SXT) | IncI1-I (Alpha)                                                     | IncQ1 | parC p.T57S | 3899 |
| <b>S194</b> | Hato  | aac(6')-Iaa;<br>aadA1; aph(3')-<br>Ia; [aph(3'')-Ib];<br>sul2; tet(A)        | dfrA14;<br>aph(6)-Id                 | TET;<br>TRISUL(SXT)      | IncI1-I (Alpha)                                                     | IncQ1 | parC p.T57S | 3899 |
| <b>S196</b> | Hato  | aac(6')-Iaa;<br>aadA1; aph(3')-<br>Ia; [aph(3'')-Ib];<br>sul2; tet(A)        | dfrA14;<br>aph(6)-Id                 | TET;<br>TRISUL(SXT)      | IncI1-I (Alpha)                                                     | IncQ1 | parC p.T57S | 3899 |
| <b>S197</b> | Hato  | aac(6')-Iaa;<br>aadA1; sul2;<br>tet(A)                                       | dfrA14;<br>aph(3'')-Ib;<br>aph(6)-Id | TET;<br>TRISUL(SXT)      | IncI1-I (Alpha)                                                     | IncQ1 | parC p.T57S | 3899 |
| <b>S198</b> | Derby | aac(6')-Iaa;<br>aph(3'')-Ib;<br>aph(6)-Id; sul2;<br>tet(A)                   |                                      | MIN; TET                 | IncQ1                                                               |       | parC p.T57S | 3135 |
| <b>S199</b> | Derby | aac(6')-Iaa;<br>aph(3'')-Ib;<br>aph(6)-Id; sul2;<br>tet(A)                   |                                      | MIN; TET                 | Col(pHAD28),<br>Col8282,<br>IncFIB (H89-<br>PhagePlasmid),<br>IncQ1 |       | parC p.T57S | 3135 |
| <b>S200</b> | Hato  | aac(6')-Iaa;<br>aadA1; aph(3')-<br>Ia; aph(6)-Id;<br>dfrA14; sul2;<br>tet(A) |                                      | TET;<br>TRISUL(SXT)      | IncI1-I (Alpha)                                                     | IncQ1 | parC p.T57S | 3899 |

|             |      |                                                                                                |                                      |                     |                 |       |             |      |
|-------------|------|------------------------------------------------------------------------------------------------|--------------------------------------|---------------------|-----------------|-------|-------------|------|
| <b>S201</b> | Hato | aac(6')-Iaa;<br>aadA1; aph(3')-<br>Ia; [aph(3'')-Ib];<br>aph(6)-Id;<br>dfrA14; sul2;<br>tet(A) |                                      | TRISUL(SXT)         | IncI1-I (Alpha) | IncQ1 | parC p.T57S | 3899 |
| <b>S202</b> | Hato | aac(6')-Iaa;<br>aadA1; aph(3')-<br>Ia; [aph(3'')-Ib];<br>aph(6)-Id;<br>dfrA14; sul2;<br>tet(A) |                                      | TET;<br>TRISUL(SXT) | IncI1-I (Alpha) | IncQ1 | parC p.T57S | 3899 |
| <b>S203</b> | Hato | aac(6')-Iaa;<br>aadA1; aph(3')-<br>Ia; sul2; tet(A)                                            | dfrA14;<br>aph(3'')-Ib;<br>aph(6)-Id | TET;<br>TRISUL(SXT) | IncI1-I (Alpha) | IncQ1 | parC p.T57S | 3899 |
| <b>S204</b> | Hato | aac(6')-Iaa;<br>aadA1; aph(3')-<br>Ia; aph(6)-Id;<br>sul2; tet(A)                              | dfrA14;<br>aph(3'')-Ib               | TET;<br>TRISUL(SXT) | IncI1-I (Alpha) | IncQ1 | parC p.T57S | 3899 |
| <b>S207</b> | Hato | aac(6')-Iaa;<br>aadA1; aph(3')-<br>Ia; [aph(3'')-Ib];<br>aph(6)-Id;<br>dfrA14; sul2;<br>tet(A) |                                      | TET;<br>TRISUL(SXT) | IncI1-I (Alpha) | IncQ1 | parC p.T57S | 3899 |
| <b>S208</b> | Hato | aac(6')-Iaa;<br>aadA1; aph(3')-<br>Ia; sul2; tet(A)                                            | dfrA14;<br>aph(3'')-Ib;<br>aph(6)-Id | TET;<br>TRISUL(SXT) | IncI1-I (Alpha) | IncQ1 | parC p.T57S | 3899 |
| <b>S209</b> | Hato | aac(6')-Iaa;<br>aadA1; aph(3')-<br>Ia; sul2; tet(A)                                            | dfrA14;<br>aph(3'')-Ib;<br>aph(6)-Id | TET;<br>TRISUL(SXT) | IncI1-I (Alpha) | IncQ1 | parC p.T57S | 3899 |
| <b>S212</b> | Hato | aac(6')-Iaa;<br>aph(3'')-Ib;<br>aph(6)-Id; sul2                                                |                                      | ND                  | IncI1-I (Alpha) | IncQ1 | parC p.T57S | 3899 |
| <b>S216</b> | Hato | aac(6')-Iaa;<br>aadA1; aph(3')-<br>Ia; sul2; tet(A)                                            | dfrA14;<br>aph(3'')-Ib;<br>aph(6)-Id | TET;<br>TRISUL(SXT) | IncI1-I (Alpha) | IncQ1 | parC p.T57S | 3899 |

|             |              |                                                                                             |                      |                          |                                                     |            |             |         |
|-------------|--------------|---------------------------------------------------------------------------------------------|----------------------|--------------------------|-----------------------------------------------------|------------|-------------|---------|
| <b>S219</b> | Hato         | aac(6')-Iaa;<br>aadA1; aph(3')-<br>Ia; [aph(3'')-Ib];<br>sul2; tet(A)                       | dfrA14;<br>aph(6)-Id | TET;<br>TRISUL(SXT)      | IncI1-I (Alpha)                                     | IncQ1      | parC p.T57S | 3899    |
| <b>S248</b> | Derby        | aac(6')-Iaa;<br>aph(3'')-Ib;<br>aph(6)-Id; sul2;<br>tet(A)                                  |                      | TET                      | Col8282,<br>IncFIB (H89-<br>PhagePlasmid),<br>IncQ1 | IncB/O/K/Z | parC p.T57S | Unknown |
| <b>S249</b> | Derby        | aac(6')-Iaa;<br>aph(3'')-Ib;<br>aph(6)-Id; sul2;<br>tet(A)                                  |                      | TET                      | Col8282,<br>IncFIB (H89-<br>PhagePlasmid),<br>IncQ1 | IncB/O/K/Z | parC p.T57S | Unknown |
| <b>S251</b> | Derby        | aac(6')-Iaa;<br>aph(3'')-Ib;<br>aph(6)-Id;<br>fosA7; sul2;<br>tet(A)                        |                      | MIN; TET                 | Col(pHAD28),<br>IncI1-I (Alpha)                     |            | parC p.T57S | 7881    |
| <b>S252</b> | Tennessee    | aac(6')-Iaa                                                                                 |                      | ND                       | ND                                                  |            | parC p.T57S | 8398    |
| <b>S253</b> | I 1,3,19:b:- | aac(6')-Iaa                                                                                 |                      | ND                       | ND                                                  |            | parC p.T57S | Unknown |
| <b>S255</b> | Kentucky     | aac(6')-Iaa;<br>aac(3)-Id;<br>aadA7; aph(3'')-<br>Ib; aph(6)-Id;<br>dfrA15; sul1;<br>tet(A) | qacE                 | GEN; TET;<br>TRISUL(SXT) | ND                                                  |            | parC p.T57S | 314     |

<sup>a</sup> Genes in brackets [ ] are complete but disrupted by an insertion

<sup>b</sup> Abbreviations indicate: TICCLA (TIM2), Ticarcillin/clavulanic acid; TET, Tetracycline; MIN, Minocycline; TRISUL(SXT), Trimethoprim/Sulfamethoxazole; PIP, Piperacillin; GEN, Gentamicin, AMPSUL (A/S2), Ampicillin/sulbactam; AMP, Ampicillin.

<sup>c</sup> ND indicates “not detected”
